# Supplementary material for: Histopathological and Molecular Study of Pacific Oyster Tissues Provides Insights into V. aestuarianus Infection Related to Oyster Mortality
Source: MDPI journal article supplement (doi:10.3390/pathogens9060492), 2020-06-20
Supplement: s1 [file s1]

**Table S1.** San Teodoro lagoon: number of oysters PCR positive to *V. aestuarianus* during mortality outbreaks associated to water temperature and salinity.

| Sampling Date          | N° Samples | <i>V. aestuarianus</i><br>PCR Positive<br>(Gills/Mantle Pools) | Water Temperature | Water Salinity |
|------------------------|------------|----------------------------------------------------------------|-------------------|----------------|
| October 2016           | 23         | -                                                              | 22 °C             | 40‰            |
| November 2016          | 16         | -                                                              | 16 °C             | 40‰            |
| <b>December 2016 *</b> | 30         | 14                                                             | 14 °C             | 40‰            |
| <b>January 2017 *</b>  | 24         | 3                                                              | 13 °C             | 40‰            |
| <b>February 2017 *</b> | 24         | 6                                                              | 14 °C             | 10‰            |
| March 2017             | 24         | -                                                              | 16 °C             | 36‰            |
| April 17               | 21         | -                                                              | 18 °C             | 42‰            |
| May 2017               | 18         | -                                                              | 20 °C             | 40‰            |
| June 2017              | 22         | -                                                              | 28 °C             | 40‰            |
| July 2017              | 20         | -                                                              | 25.3 °C           | 41‰            |
| August 2017            | 16         | -                                                              | 26 °C             | 42‰            |
| September 2017         | 26         | -                                                              | 22 °C             | 42‰            |
| October 2017           | 18         | -                                                              | 18.5 °C           | 44‰            |
| November 2017          | 15         | -                                                              | 17.5 °C           | 40‰            |
| December 2017          | 12         | -                                                              | 12 °C             | 42‰            |
| January 2018           | 18         | -                                                              | 13 °C             | 24‰            |
| February 2018          | 14         | -                                                              | 13 °C             | 36‰            |
| June 2018              | 17         | 5                                                              | 24.4 °C           | 40‰            |
| Total                  | 358        | 28                                                             |                   |                |

\* Mortality outbreaks time span.
